# Supplementary material
Source: publisher site journal article supplement (https://www.dovepress.com/article/261321)
Supplement: Supplementary file 1 [file get_supplementary_file.php]

| Combination index (CI) | Symbol | Description graded |
| --- | --- | --- |
| <0.1 | +++++ | Very strong synergism |
| 0.1-0.3 | ++++ | Strong synergism |
| 0.3-0.7 | +++ | Synergism |
| 0.7-0.85 | ++ | Moderate synergism |
| 0.85-0.90 | + | Slight synergism |
| 0.90-1.10 | ± | Nearly additive |
| 1.10-1.20 | – | Slight antagonism |
| 1.20-1.45 | – – | Moderate antagonism |
| 1.45-3.3 | – – – | Antagonism |
| 3.3-10 | – – – – | Strong antagonism |
| >10 | – – – – – | Very strong antagonism |

**Supplementary Table: Recommended symbols for describing synergism or antagonism in drug combination studies analyzed with the combination index (CI)**
